# Supplementary material
Source: PubMed Central journal article supplement (PMC3421062)
Supplement: NIHMS393836-supplement-2.pdf [file NIHMS393836-supplement-2.pdf]

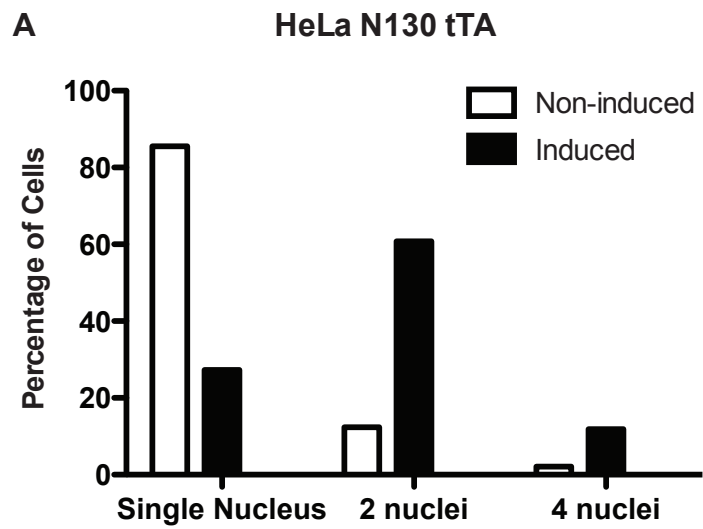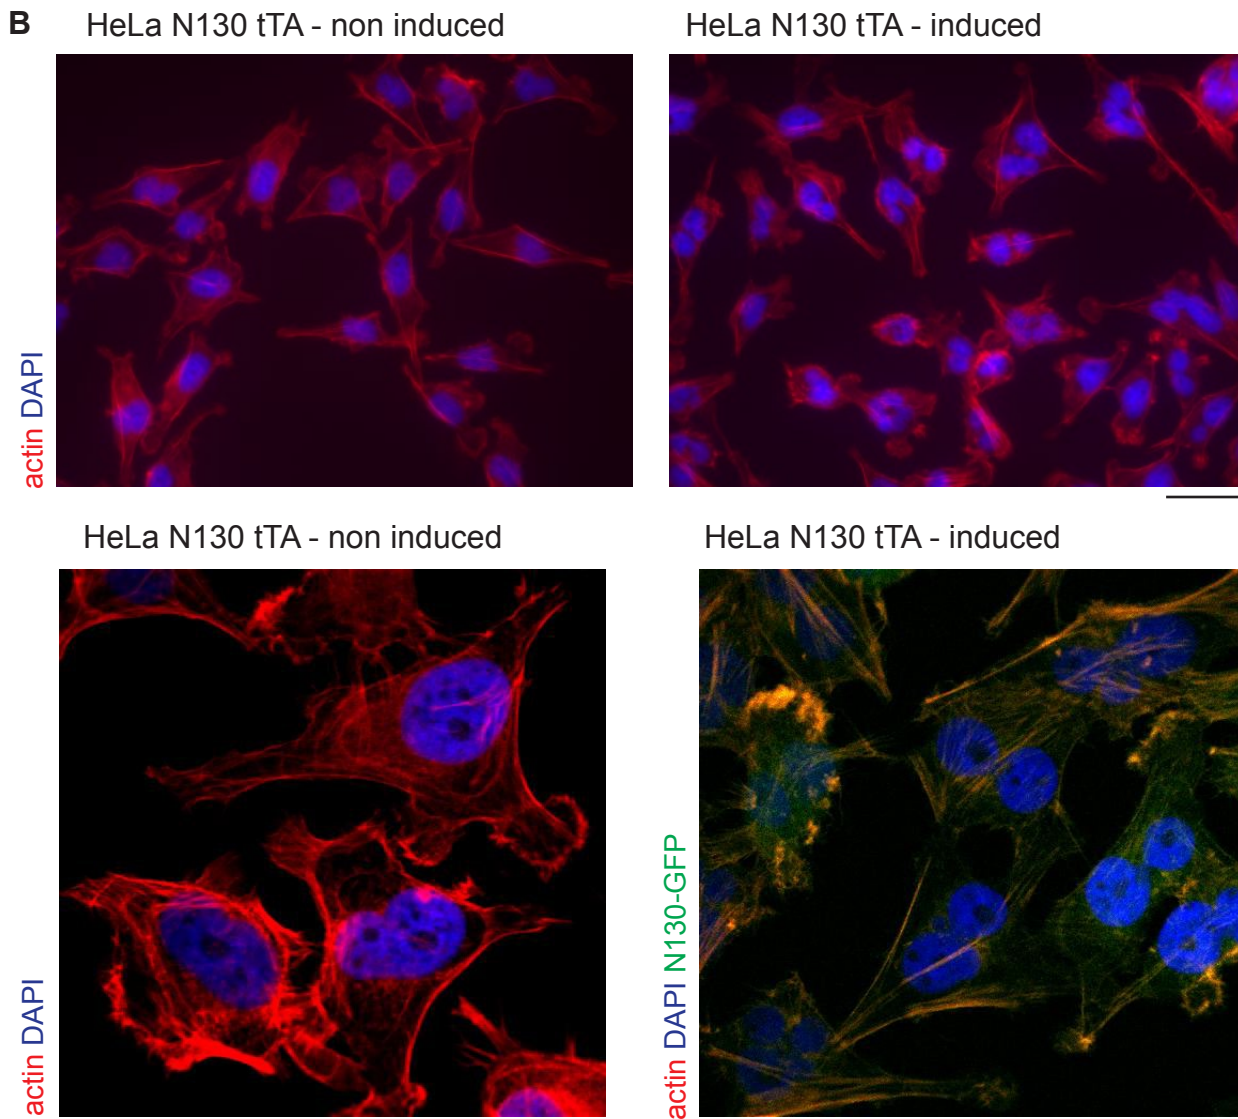

**Figure S1. A.** The induced expression of a NAC1 deletion mutant (N130) containing the BTB domain in HeLa cells causes an increase in the percentage of cells with more than 2 nuclei. **B.** Immunofluorescence microscopy demonstrates polyploid HeLa cells with two nuclei after BTB domain induction. Specimens were counterstained with DAPI for the nucleus. Top set: Scale bar, 50  $\mu$ M. Bottom set: Images obtained using confocal microscope and 40x objective. Scale bar, 10  $\mu$ M.
