# Supplementary material
Source: PubMed Central journal article supplement (PMC3421062)
Supplement: NIHMS393836-supplement-5.pdf [file NIHMS393836-supplement-5.pdf]

Yap et al - Fig. S4

A Day 3 of knockdown

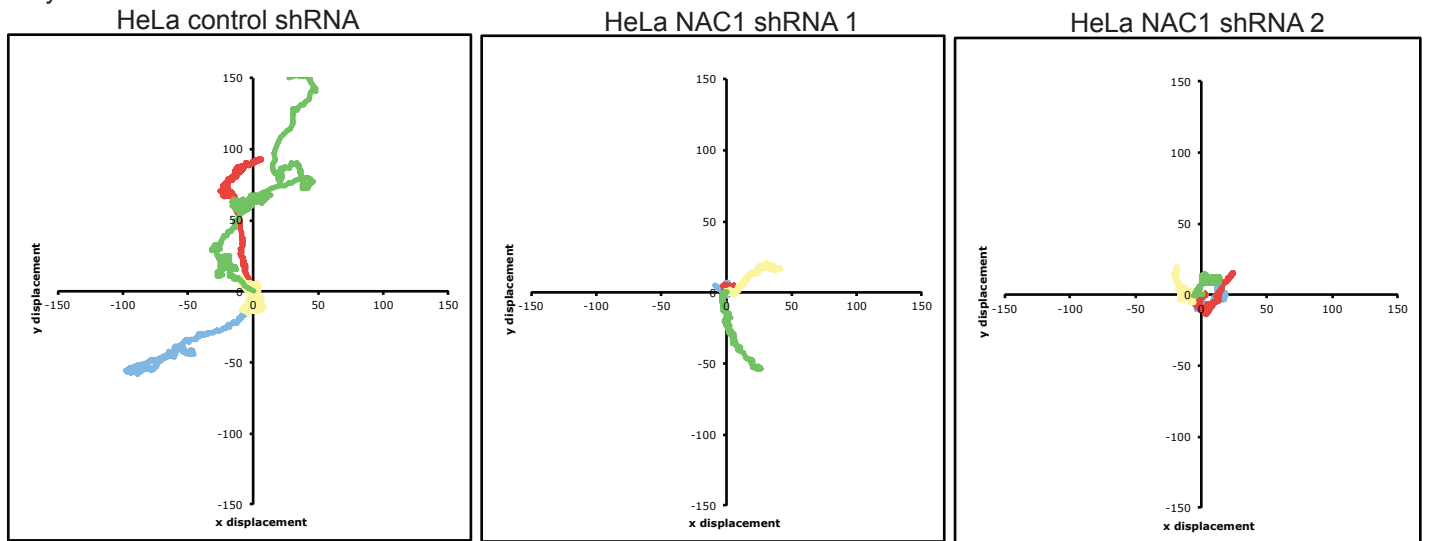

B Day 6 of knockdown

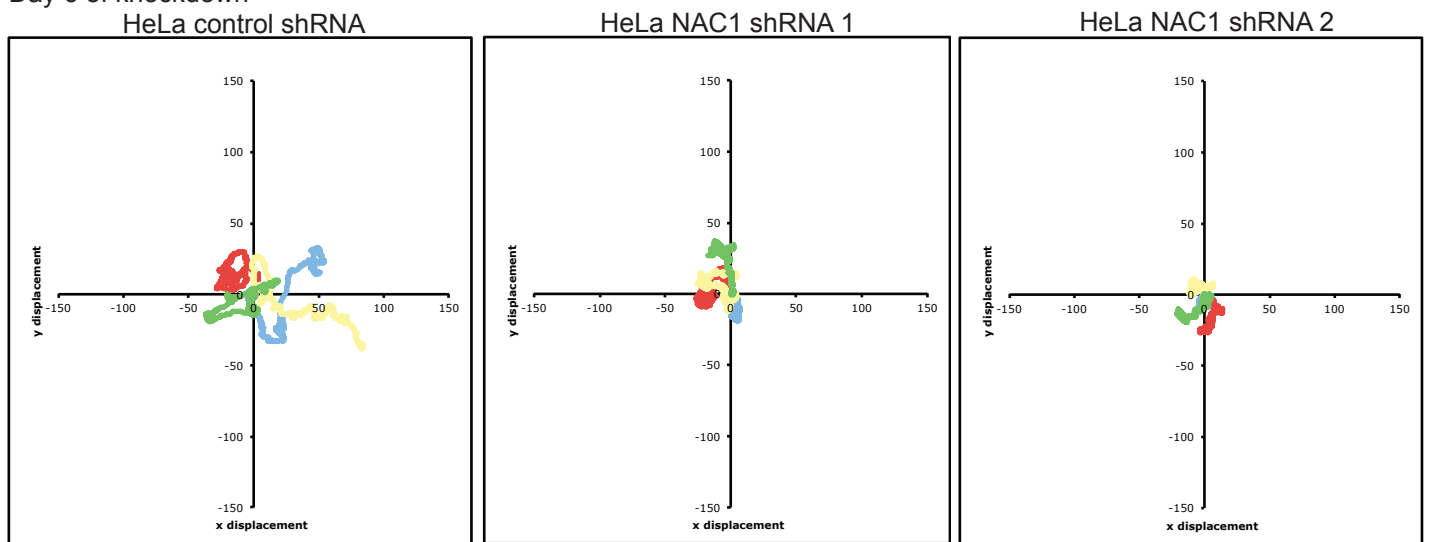

C

Relative mRNA Expression of NAC1

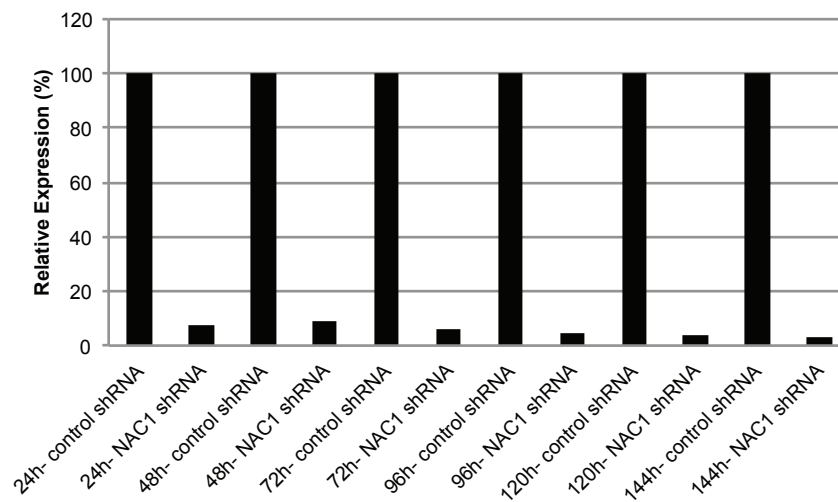

**Figure S4.** Typical trajectories of displacement from origin of HeLa cells after control lentiviral shRNA and NAC1 shRNA treatment for **A.** 3 days and **B.** 6 days. **C.** NAC1 was silenced by transducing NAC1 shRNA lentiviral particles into SKOV3 and HeLa cell lines. Successfully transduced cells were positively selected for by the addition of puromycin to the growth media (1 $\mu$ g/ml). Silencing was effectively sustained over a period of 6 days.
