# Supplementary material
Source: PubMed Central journal article supplement (PMC3421062)
Supplement: NIHMS393836-supplement-7.pdf [file NIHMS393836-supplement-7.pdf]

A

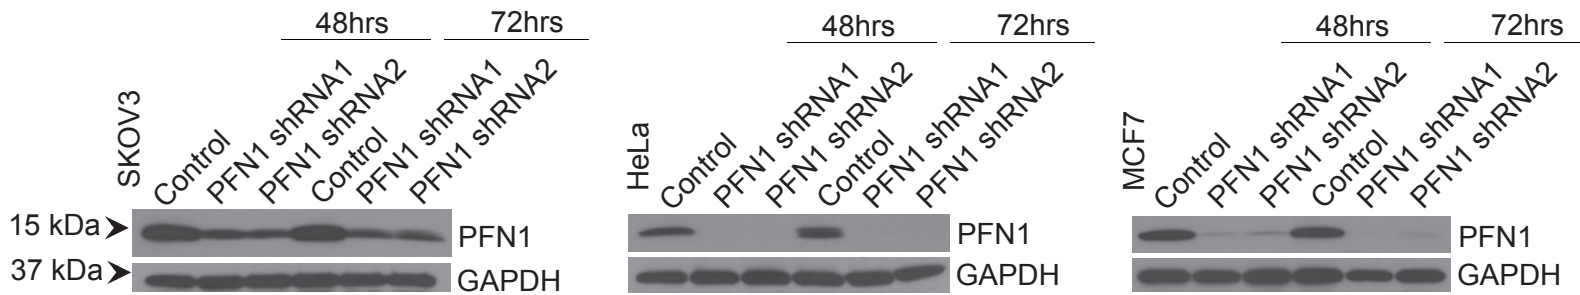

B HeLa cells after lentiviral knockdown (Day 3)

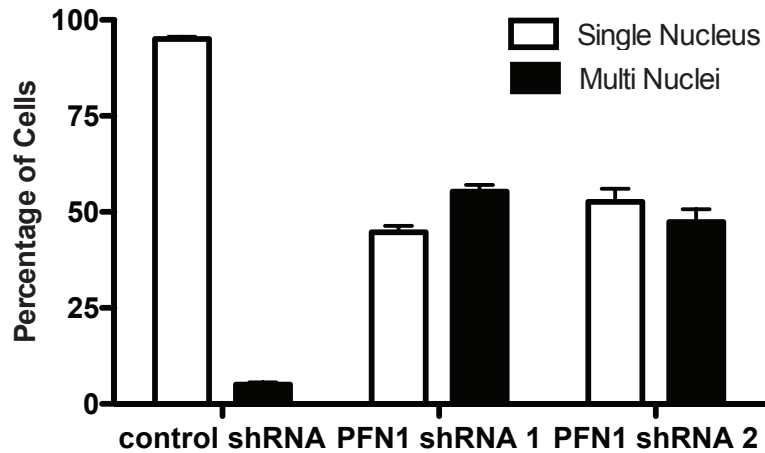

C

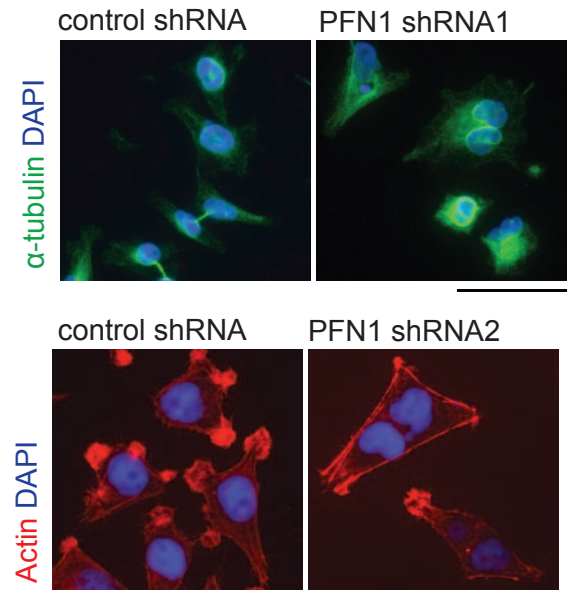

D Relative Cell Number after PFN1 shRNA treatment (over control shRNA)

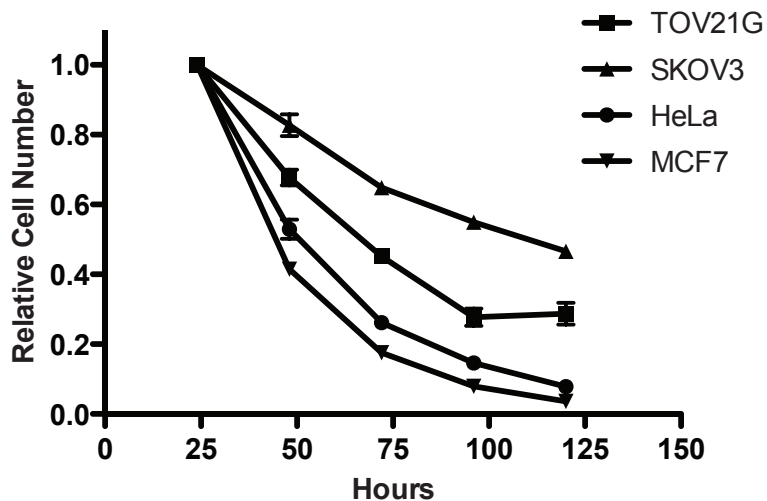

E

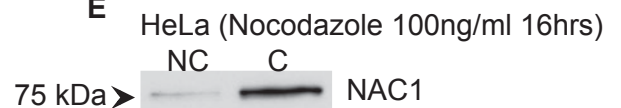

**Figure S6.** **A.** Western blot analysis showed efficient silencing of profilin-1 using lentiviral shRNAs in SKOV3, HeLa and MCF7 cancer cell lines. GAPDH was used to indicate protein loading. **B.** Quantification of the multi-nucleated cells after profilin-1-silencing revealed a significant proportion of multi-nucleated cells. Images of randomly selected field of view were used for quantification of cells for each condition. Average number of cells counted for each condition was approximately 130. Error bars denote the standard deviation between each image. **C.** Immunofluorescence staining demonstrated the multi-nucleation phenotype presented by profilin-1-silenced cells. Cells were counterstained with DAPI for the nuclei. Scale bar, 100  $\mu$ m. **D.** Proliferation assay to determine the effects of profilin-1 silencing. **E.** Staining of NAC1 in mitotically-arrested cells showed its preferential accumulation in the cytoplasmic compartment (vs. nuclear-chromosomal) during this phase of the cell cycle. NC- Nuclear chromosomal; C- cytoplasmic.
