# Supplementary material
Source: PubMed Central journal article supplement (PMC3421062)
Supplement: NIHMS393836-supplement-9.pdf [file NIHMS393836-supplement-9.pdf]

**A** NAC1 domain mapping

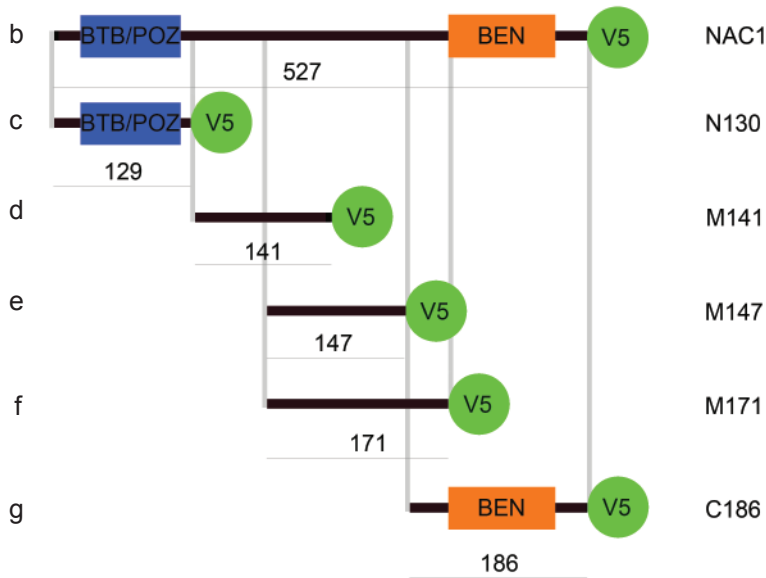

**B**

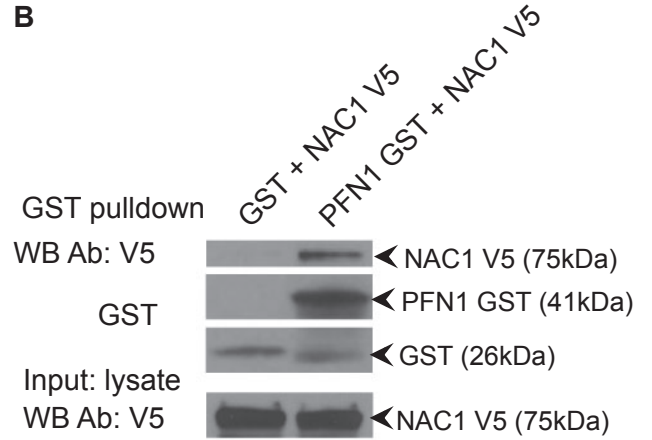

**C1**

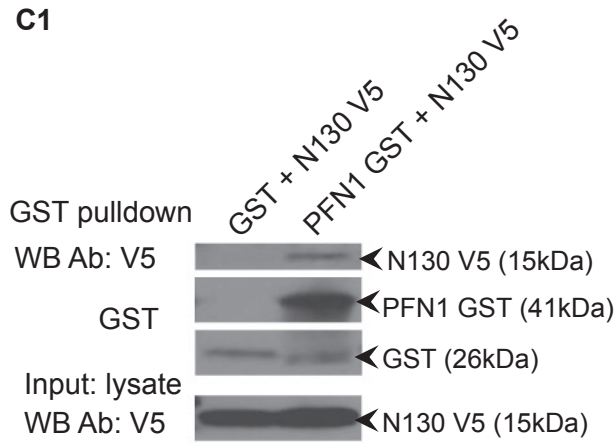

**C2**

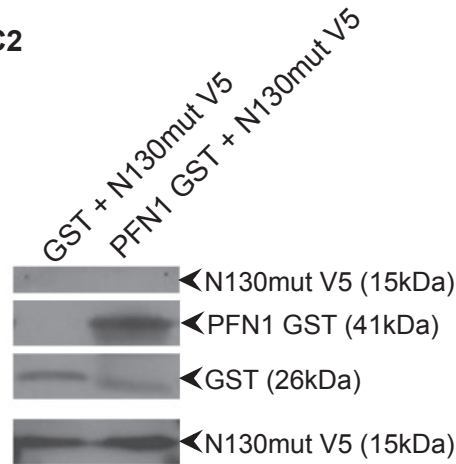

**D**

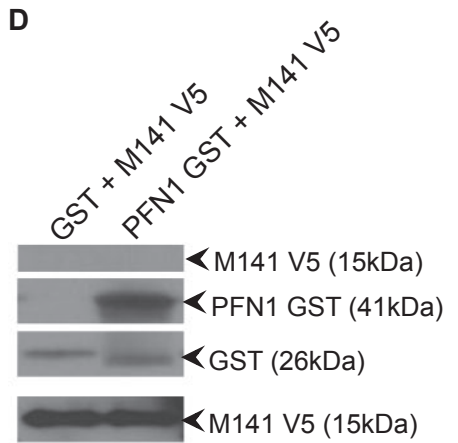

**E**

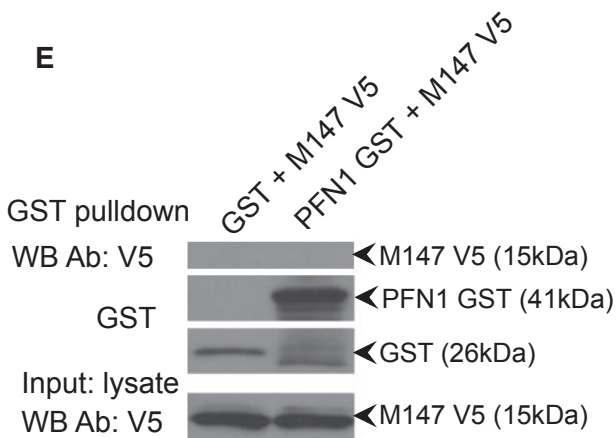

**F**

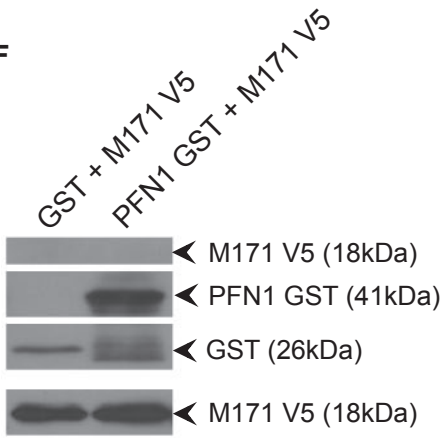

**G**

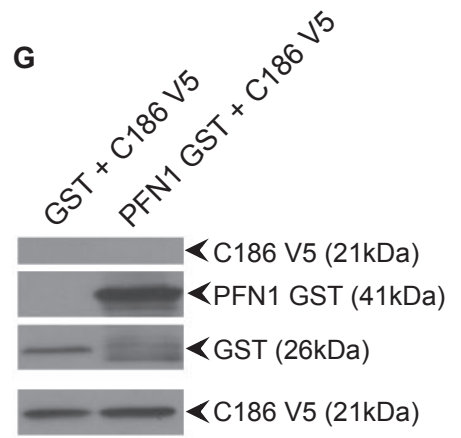

**Figure S8.** Domain mapping of NAC1 binding region. **A.** Deletion mutants of NAC1 were cloned into the pcDNA6-V5 vector to define the binding domain responsible for its interaction with the profilin-1/actin complex. Domains assigned b-g. HEK293T cells were co-transfected with the profilin-1-GST constructs and the NAC1-V5 deletion mutants (**B-G**), immunoprecipitated for the GST proteins and immunoblotted for the V5 proteins. Through direct binding of the BTB domain (B and C1) of NAC1 to actin, NAC1 could be isolated in the protein complex of profilin-1/actin.
